# Supplementary material for: Measuring T1 relaxation in paramagnetic solids with solid-state NMR: a case study on the milling induced phase transition in Li6CoO4
Source: Royal Society of Chemistry journal article supplement (doi:10.1039/d3cp00757j), 2023-01-01
Supplement: d3cp00757j1.pdf [file d3cp00757j1.pdf]

**Supporting Information for**

**Measuring  $T_1$  relaxation in paramagnetic solids with**

**solid-state NMR: A case study on the milling induced phase**

**transition in  $\text{Li}_6\text{CoO}_4$**

Nianrui Guo, Fushan Geng, Guozhong Lu, Xinbiao Jiang, Chao Li, Bingwen Hu, Ming Shen\*

Shanghai Key Laboratory of Magnetic Resonance, State Key Laboratory of Precision  
Spectroscopy, School of Physics and Electronic Science, East China Normal University, Shanghai  
200241, P. R. China

E-mail: [mshen@phy.ecnu.edu.cn](mailto:mshen@phy.ecnu.edu.cn)

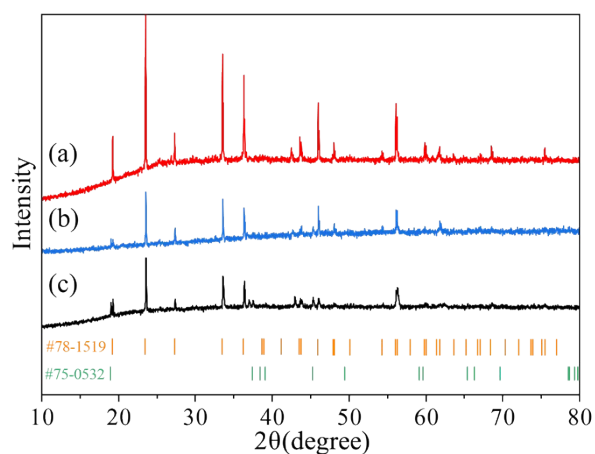

**Fig. S1.** XRD patterns of  $\text{Li}_6\text{CoO}_4$  synthesized using sealed quartz tubes with reactants pressed into tablets (a), using sealed quartz tubes with powered reactants (b), and using tubular furnace with reactants pressed into tablets (c). The reference PDF cards for tetragonal  $\text{Li}_6\text{CoO}_4$  (#78-1519) and trigonal layered  $\text{LiCoO}_2$  (#75-0532) are depicted for comparison.

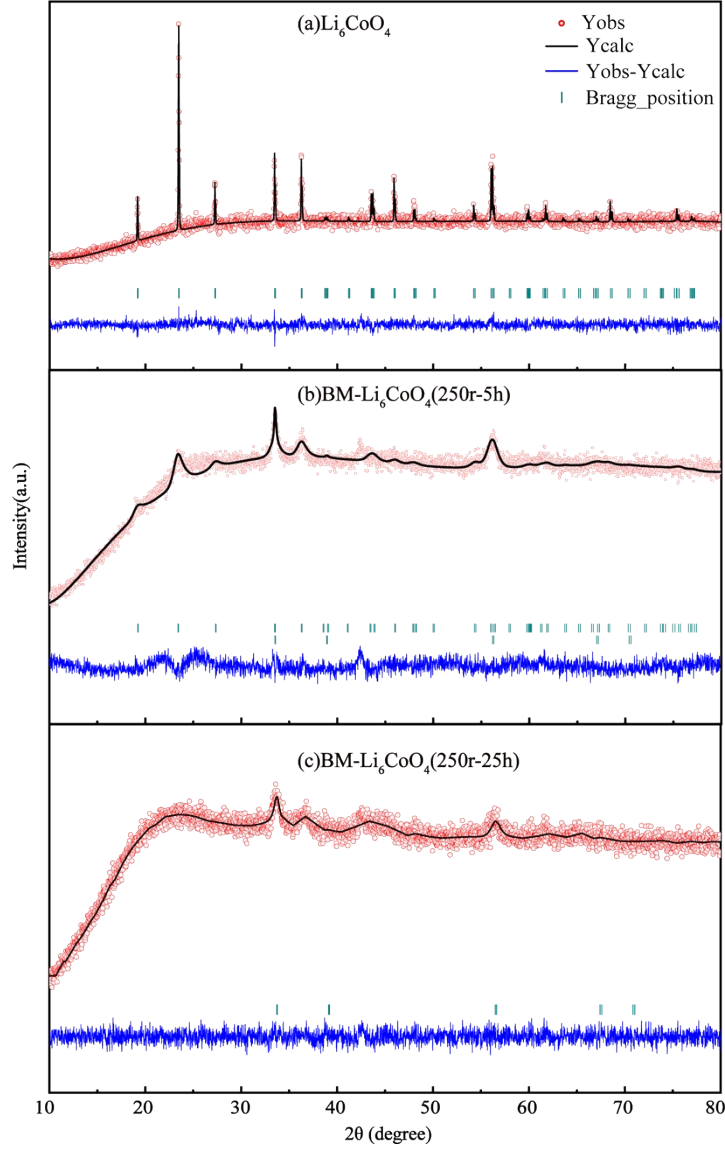

**Fig. S2.** Rietveld refinement on the laboratory XRD patterns of  $\text{Li}_6\text{CoO}_4$  (a),  $\text{BM-Li}_6\text{CoO}_4(250\text{r-5h})$  (b), and  $\text{BM-Li}_6\text{CoO}_4(250\text{r-5h})$  (c). The refined structural parameters are listed in **Table S1** in the following.

**Table S1.** Results of Rietveld refinement shown in Fig. S2.

| sample/phase                                                                     | space group | lattice parameters<br>(Å) | atom | site       | occupancy(g) and<br>atomic coordination | fraction<br>(mol%) |
|----------------------------------------------------------------------------------|-------------|---------------------------|------|------------|-----------------------------------------|--------------------|
| Li <sub>6</sub> CoO <sub>4</sub><br>ordered phase                                | P42/nmc     | a=6.545(1)<br>c=4.651(5)  | Li1  | 8 <i>f</i> | x = 0.020(1)                            | 100                |
|                                                                                  |             |                           | Li2  | 4 <i>d</i> | z = 0.283(5)                            |                    |
|                                                                                  |             |                           | Co   | 2 <i>a</i> |                                         |                    |
|                                                                                  |             |                           | O    | 8 <i>g</i> | y = 0.532(1)                            |                    |
| Rwp = 3.55 %, Rp = 2.80 %, Re =3.27%, and S = 1.09.                              |             |                           |      |            |                                         |                    |
| Li <sub>6</sub> CoO <sub>4</sub> (BM250r-5h)<br>ordered<br>and disordered phases | P42/nmc     | a= 6.528(7)<br>c=4.669(9) | Li1  | 8 <i>f</i> | x = -0.009(5)                           | 63(5)              |
|                                                                                  |             |                           | Li2  | 4 <i>d</i> | z = 2.764(2)                            |                    |
|                                                                                  |             |                           | Co   | 2 <i>a</i> |                                         |                    |
|                                                                                  |             |                           | O    | 8 <i>g</i> | y = 0.523(1)                            |                    |
|                                                                                  |             |                           |      |            | z = 0.507(8)                            |                    |

|                                                    |              |            |    |            |           |       |
|----------------------------------------------------|--------------|------------|----|------------|-----------|-------|
|                                                    | $Fm\bar{3}m$ | a=4.616(7) | Li | 8 <i>c</i> | g = 0.75  | 36(4) |
|                                                    |              |            | Co | 8 <i>c</i> | g = 0.125 |       |
|                                                    |              |            | O  | 4 <i>a</i> |           |       |
| Rwp = 1.70%, Rp = 1.36%, Re = 1.15%, and S = 1.48  |              |            |    |            |           |       |
| Li <sub>6</sub> CoO <sub>4</sub> (BM250r-25h)      | $Fm\bar{3}m$ | a=4.613(4) | Li | 8 <i>c</i> | g = 0.75  | 100   |
| disordered phase                                   |              |            | Co | 8 <i>c</i> | g = 0.125 |       |
|                                                    |              |            | O  | 4 <i>a</i> |           |       |
| Rwp = 1.40%, Rp = 1.12%, Re = 1.12%, and S = 1.25. |              |            |    |            |           |       |

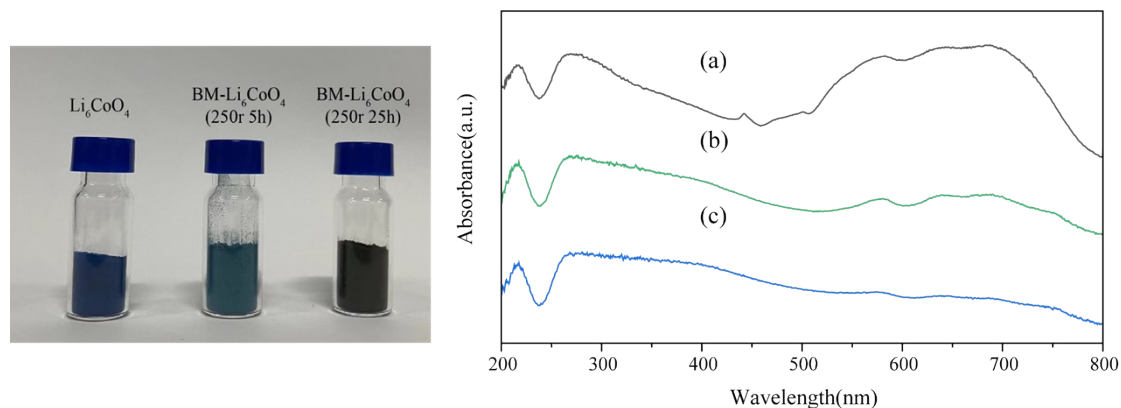

**Fig. S3.** Photographs of synthesized pristine  $\text{Li}_6\text{CoO}_4$  and ball-milled samples. The change of color from dark blue to black is in accordance with the UV-Vis spectroscopy results.

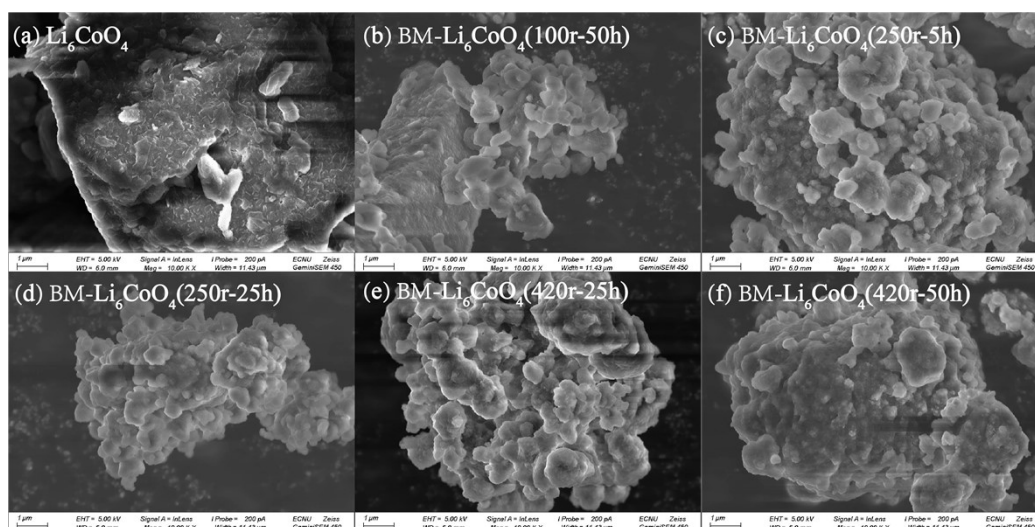

**Fig. S4.** SEM images of pristine  $\text{Li}_6\text{CoO}_4$  and ball-milled samples.

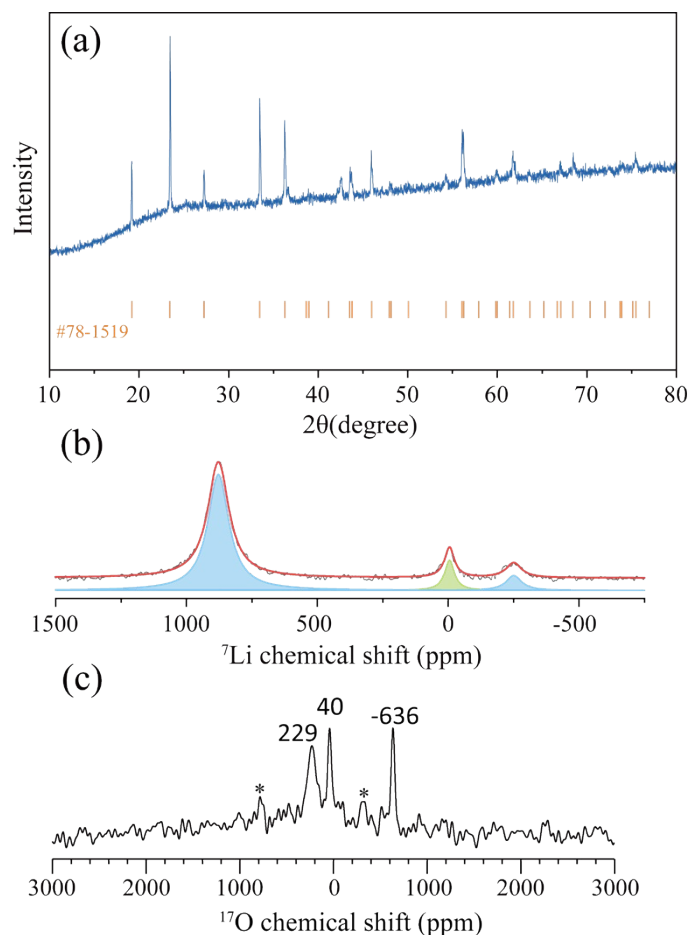

**Fig. S5.** (a) XRD pattern, (b)  $^7\text{Li}$  pjMATPASS projection, and (c)  $^{17}\text{O}$  Hahn-echo spectrum of  $^{17}\text{O}$ -labelled  $\text{Li}_6\text{CoO}_4$ . The reference PDF card for tetragonal  $\text{Li}_6\text{CoO}_4$  (#78-1519) is shown in (a) for comparison.

Although only diffraction peaks from  $\text{Li}_6\text{CoO}_4$  are shown from XRD results, the  $^7\text{Li}$  resonance at 0 ppm and  $^{17}\text{O}$  resonance at -636 ppm is a strong signature of  $\text{LiCoO}_2$ . We tentatively assign 229 ppm resonance to oxygen atoms in  $\text{Li}_6\text{CoO}_4$  lattice and the 40 ppm resonance to oxygen atoms in diamagnetic impurity, possibly from  $\text{Li}_2\text{CO}_3$ .

The synthesis of this sample is based on a low-cost  $\text{H}_2^{17}\text{O}$ -based method, which is similar to others report. (Métro, T.-X.; Gervais, C.; Martinez, A.; Bonhomme, C.; Laurencin, D. Unleashing the Potential of  $^{17}\text{O}$  NMR Spectroscopy Using Mechanochemistry. *Angewandte Chemie International Edition* 2017, 56 (24), 6803-6807.) 0.01 mol of  $\text{Li}_2\text{O}$ , 0.01 mol of  $\text{CoO}$  and 0.5 ml  $\text{H}_2^{17}\text{O}$  (35-40%  $^{17}\text{O}$  labelling, Cambridge Isotope) were grounded for 30 minutes in a 45 mL zirconia grinding bowl with two zirconia balls using a SPEX 8000M Mixer/Mill. The mixture was then calcinated at 700 °C with a heating rate of 5 °C/min under argon flow for 12 h in a tube furnace. The product was manually grounded in an agate mortar and stored in an argon-filled glove box.

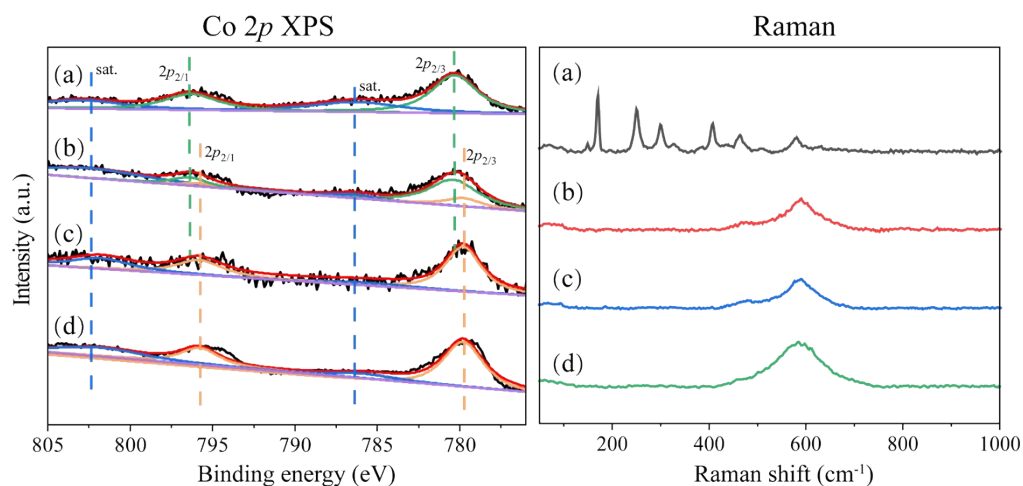

**Fig. S6.** Co 2*p* XPS and Raman spectra of pristine  $\text{Li}_6\text{CoO}_4$  (a) and ball-milled samples:  $\text{Li}_6\text{CoO}_4(\text{BM250r-5h})$  (b),  $\text{Li}_6\text{CoO}_4(\text{BM250r-25h})$  (c), and  $\text{Li}_6\text{CoO}_4(\text{BM250r-50h})$  (d). The Co 2*p* XPS spectra have two main peaks due to spin-orbit splitting with satellite peaks labelled as ‘sat.’.

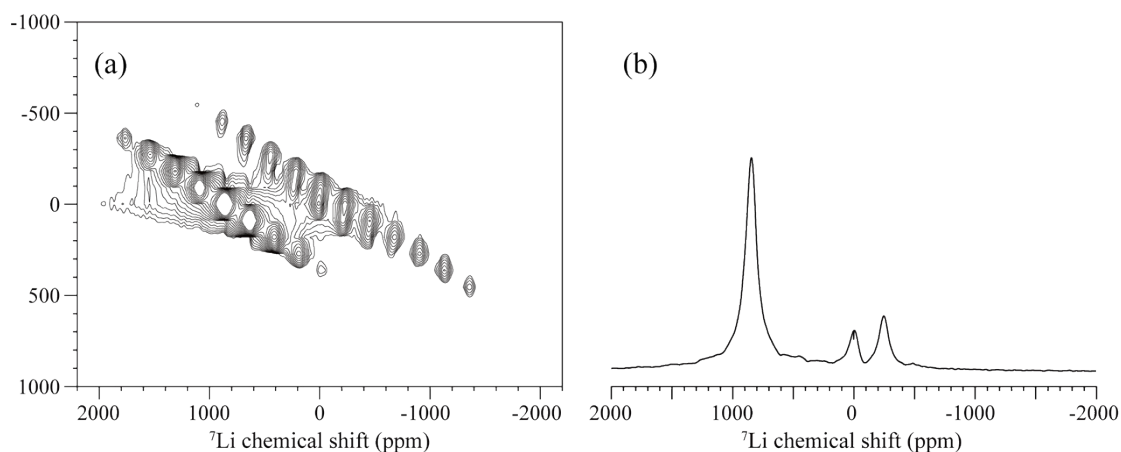

**Fig. S7.** (a) 2D  $^7\text{Li}$  pj-MATPASS spectrum of  $\text{Li}_6\text{CoO}_4$  synthesized using tubular furnace with reactants pressed into tablets. (b)  $^7\text{Li}$  1D projection taken from (a) after shearing transformation. Because this sample is partially oxidized to  $\text{LiCoO}_2$  owing to limited air tightness, an additional 0 ppm resonance is shown. The spectrum was recorded with a recycle delay of 0.1 s, which leads to underestimated peak intensity of the  $\text{LiCoO}_2$  phase. The XRD pattern of this sample is shown in Fig. S1(c).

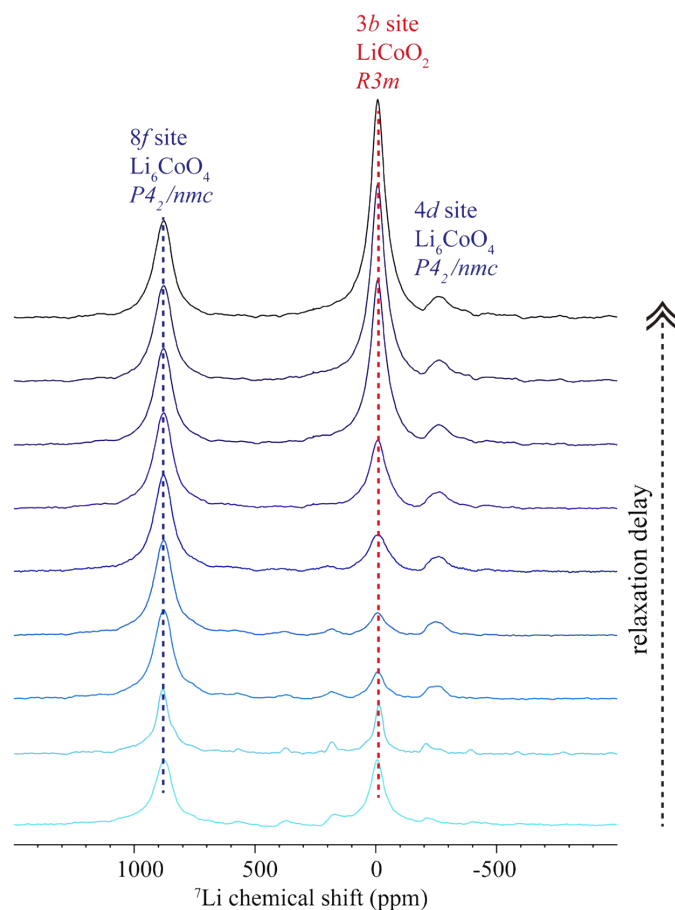

**Fig. S8.**  $^7\text{Li}$  1D projections extracted from 2D IR-pjMATPASS spectra acquired with incremented relaxation delays. Note that in typical IR experiments, short relaxation delays result in signals with negative intensities. In IR-pjMATPASS, signals are all positive because of the single coherence transfer pathway.

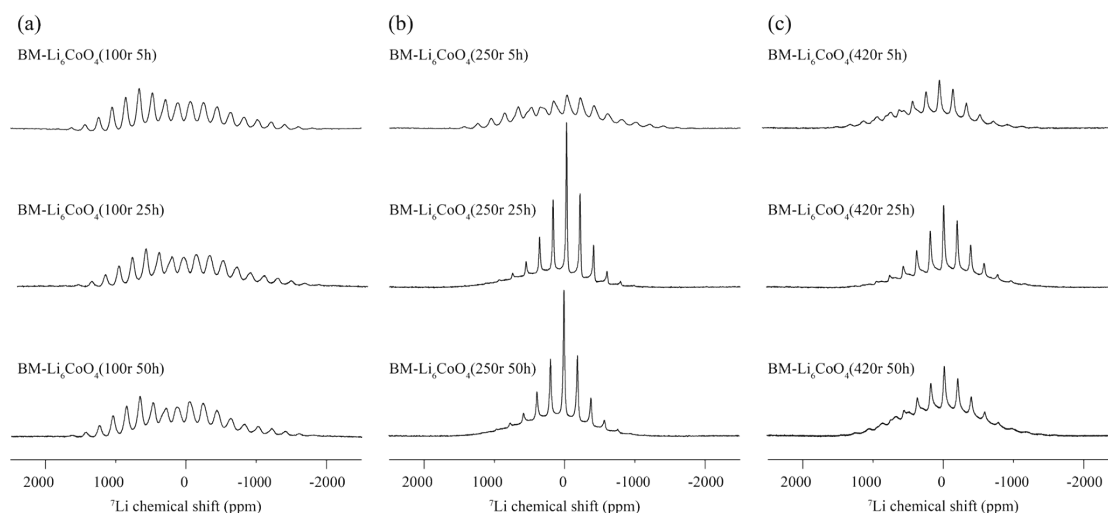

**Fig. S9.**  $^7\text{Li}$  one-dimensional Hahn-echo spectra of ball-milled samples.
